# Supplementary material for: In Vitro Activity of “Last Chance” Antimicrobials against Klebsiella pneumoniae Complex.
Source: Preprints.org preprint supplement (doi:10.20944/preprints202312.1646.v1), 2023-12-21
Supplement: Supplementary file 1 [file supplementary]

Table S1: The susceptibility to antimicrobials of *K. pneumoniae* complex strains ( $n = 160$ )

| No. | Species              | Susceptibility |
|-----|----------------------|----------------|
| 1   | <i>K. pneumoniae</i> | AN             |
| 2   | <i>K. pneumoniae</i> | SXT            |
| 3   | <i>K. pneumoniae</i> | -              |
| 4   | <i>K. pneumoniae</i> | -              |
| 5   | <i>K. pneumoniae</i> | -              |
| 6   | <i>K. pneumoniae</i> | -              |
| 7   | <i>K. pneumoniae</i> | -              |
| 8   | <i>K. pneumoniae</i> | -              |
| 9   | <i>K. pneumoniae</i> | -              |
| 10  | <i>K. pneumoniae</i> | MEM, AN        |
| 11  | <i>K. pneumoniae</i> | GM, NN, AN     |
| 12  | <i>K. pneumoniae</i> | GM, SXT        |
| 13  | <i>K. pneumoniae</i> | GM, AN, SXT    |
| 14  | <i>K. pneumoniae</i> | GM, AN         |
| 15  | <i>K. pneumoniae</i> | AN             |
| 16  | <i>K. pneumoniae</i> | AN             |
| 17  | <i>K. pneumoniae</i> | AN             |
| 18  | <i>K. pneumoniae</i> | AN             |
| 19  | <i>K. pneumoniae</i> | AN             |
| 20  | <i>K. pneumoniae</i> | AN             |
| 21  | <i>K. pneumoniae</i> | AN             |
| 22  | <i>K. pneumoniae</i> | AN             |
| 23  | <i>K. pneumoniae</i> | AN             |
| 24  | <i>K. pneumoniae</i> | AN             |
| 25  | <i>K. pneumoniae</i> | AN             |
| 26  | <i>K. pneumoniae</i> | AN             |
| 27  | <i>K. pneumoniae</i> | GM, NN, AN     |
| 28  | <i>K. pneumoniae</i> | GM, AN, NN     |
| 29  | <i>K. pneumoniae</i> | GM, SXT        |
| 30  | <i>K. pneumoniae</i> | GM, SXT        |
| 31  | <i>K. pneumoniae</i> | GM, SXT        |
| 32  | <i>K. pneumoniae</i> | GM             |
| 33  | <i>K. pneumoniae</i> | GM, SXT        |
| 34  | <i>K. pneumoniae</i> | GM, SXT        |
| 35  | <i>K. pneumoniae</i> | GM             |
| 36  | <i>K. pneumoniae</i> | GM             |
| 37  | <i>K. pneumoniae</i> | GM, SXT        |
| 38  | <i>K. pneumoniae</i> | GM, SXT        |
| 39  | <i>K. pneumoniae</i> | GM             |
| 40  | <i>K. pneumoniae</i> | GM, SXT        |
| 41  | <i>K. pneumoniae</i> | GM, AN, SXT    |
| 42  | <i>K. pneumoniae</i> | AN             |
| 43  | <i>K. pneumoniae</i> | -              |
| 44  | <i>K. pneumoniae</i> | GM, SXT        |
| 45  | <i>K. pneumoniae</i> | GM             |
| 46  | <i>K. pneumoniae</i> | -              |
| 47  | <i>K. pneumoniae</i> | GM, AN         |
| 48  | <i>K. pneumoniae</i> | GM, AN, SXT    |
| 49  | <i>K. pneumoniae</i> | SXT            |
| 50  | <i>K. pneumoniae</i> | -              |
| 51  | <i>K. pneumoniae</i> | -              |
| 52  | <i>K. pneumoniae</i> | -              |
| 53  | <i>K. pneumoniae</i> | -              |
| 54  | <i>K. pneumoniae</i> | GM, AN, SXT    |

|     |                      |                   |
|-----|----------------------|-------------------|
| 55  | <i>K. pneumoniae</i> | -                 |
| 56  | <i>K. pneumoniae</i> | AN                |
| 57  | <i>K. pneumoniae</i> | -                 |
| 58  | <i>K. pneumoniae</i> | -                 |
| 59  | <i>K. pneumoniae</i> | -                 |
| 60  | <i>K. pneumoniae</i> | -                 |
| 61  | <i>K. pneumoniae</i> | -                 |
| 62  | <i>K. pneumoniae</i> | -                 |
| 63  | <i>K. pneumoniae</i> | GM, AN, NN        |
| 64  | <i>K. pneumoniae</i> | GM, AN            |
| 65  | <i>K. pneumoniae</i> | -                 |
| 66  | <i>K. pneumoniae</i> | -                 |
| 67  | <i>K. pneumoniae</i> | GM                |
| 68  | <i>K. pneumoniae</i> | AN                |
| 69  | <i>K. pneumoniae</i> | GM, AN            |
| 70  | <i>K. pneumoniae</i> | AN                |
| 71  | <i>K. pneumoniae</i> | AN                |
| 72  | <i>K. pneumoniae</i> | GM, AN            |
| 73  | <i>K. pneumoniae</i> | AN                |
| 74  | <i>K. pneumoniae</i> | AN                |
| 75  | <i>K. pneumoniae</i> | GM                |
| 76  | <i>K. pneumoniae</i> | AN, CIP, LEV, SXT |
| 77  | <i>K. pneumoniae</i> | -                 |
| 78  | <i>K. pneumoniae</i> | -                 |
| 79  | <i>K. pneumoniae</i> | GM, AN            |
| 80  | <i>K. pneumoniae</i> | -                 |
| 81  | <i>K. pneumoniae</i> | GM, AN            |
| 82  | <i>K. pneumoniae</i> | -                 |
| 83  | <i>K. pneumoniae</i> | AN                |
| 84  | <i>K. pneumoniae</i> | -                 |
| 85  | <i>K. pneumoniae</i> | -                 |
| 86  | <i>K. pneumoniae</i> | -                 |
| 87  | <i>K. pneumoniae</i> | -                 |
| 88  | <i>K. pneumoniae</i> | -                 |
| 89  | <i>K. pneumoniae</i> | -                 |
| 90  | <i>K. pneumoniae</i> | -                 |
| 91  | <i>K. pneumoniae</i> | -                 |
| 92  | <i>K. pneumoniae</i> | -                 |
| 93  | <i>K. pneumoniae</i> | -                 |
| 94  | <i>K. pneumoniae</i> | -                 |
| 95  | <i>K. pneumoniae</i> | -                 |
| 96  | <i>K. pneumoniae</i> | -                 |
| 97  | <i>K. pneumoniae</i> | GM                |
| 98  | <i>K. pneumoniae</i> | IPM, MEM, AN      |
| 99  | <i>K. pneumoniae</i> | IPM, AN, SXT      |
| 100 | <i>K. pneumoniae</i> | IPM, MEM, AN      |
| 101 | <i>K. pneumoniae</i> | IPM, MEM, GM      |
| 102 | <i>K. pneumoniae</i> | NN, AN            |
| 103 | <i>K. pneumoniae</i> | IPM, MEM, GM      |
| 104 | <i>K. pneumoniae</i> | IPM, AN           |
| 105 | <i>K. pneumoniae</i> | IPM, MEM, GM      |
| 106 | <i>K. pneumoniae</i> | IPM, MEM, AN      |
| 107 | <i>K. pneumoniae</i> | IPM, MEM, AN      |
| 108 | <i>K. pneumoniae</i> | IPM, MEM, GM      |
| 109 | <i>K. pneumoniae</i> | IPM, AN, SXT      |
| 110 | <i>K. pneumoniae</i> | IPM, MEM, GM      |
| 111 | <i>K. pneumoniae</i> | IPM, MEM, AN      |

|     |                      |                           |
|-----|----------------------|---------------------------|
| 112 | <i>K. pneumoniae</i> | IPM, MEM, GM              |
| 113 | <i>K. pneumoniae</i> | IPM, MEM, GM, AN          |
| 114 | <i>K. pneumoniae</i> | IPM, MEM, GM, AN, NN      |
| 115 | <i>K. pneumoniae</i> | IPM, MEM, GM, CIP, LEV    |
| 116 | <i>K. pneumoniae</i> | IPM, MEM, GM, AN, NN      |
| 117 | <i>K. pneumoniae</i> | IPM, MEM, GM              |
| 118 | <i>K. pneumoniae</i> | IPM, MEM, GM, AN, NN, SXT |
| 119 | <i>K. pneumoniae</i> | IPM, MEM, GM              |
| 120 | <i>K. pneumoniae</i> | IPM, MEM, GM, AN          |
| 121 | <i>K. pneumoniae</i> | IPM, MEM, GM, AN          |
| 122 | <i>K. pneumoniae</i> | GM, AN                    |
| 123 | <i>K. pneumoniae</i> | IPM, MEM, GM              |
| 124 | <i>K. pneumoniae</i> | IPM, MEM, AN              |
| 125 | <i>K. pneumoniae</i> | AN                        |
| 126 | <i>K. pneumoniae</i> | IPM                       |
| 127 | <i>K. pneumoniae</i> | -                         |
| 128 | <i>K. pneumoniae</i> | GM                        |
| 129 | <i>K. pneumoniae</i> | IPM, GM, CIP, LEV         |
| 130 | <i>K. pneumoniae</i> | IPM, MEM                  |
| 131 | <i>K. pneumoniae</i> | GM, AN                    |
| 132 | <i>K. pneumoniae</i> | -                         |
| 133 | <i>K. pneumoniae</i> | IPM, GM, AN               |
| 134 | <i>K. pneumoniae</i> | AN                        |
| 135 | <i>K. pneumoniae</i> | IPM, AN                   |
| 136 | <i>K. pneumoniae</i> | GM, AN, NN, CIP, LEV, SXT |
| 137 | <i>K. pneumoniae</i> | GM, AN                    |
| 138 | <i>K. pneumoniae</i> | IPM, MEM                  |
| 139 | <i>K. variicola</i>  | IPM, MEM, GM, AN          |
| 140 | <i>K. variicola</i>  | TZP, IPM, MEM, GM         |
| 141 | <i>K. variicola</i>  | AN                        |
| 142 | <i>K. variicola</i>  | IPM, MEM, AN, CIP, LEV    |
| 143 | <i>K. variicola</i>  | IPM, MEM, AN, CIP, LEV    |
| 144 | <i>K. variicola</i>  | IPM, MEM, GM, AN          |
| 145 | <i>K. variicola</i>  | AN, CIP, LEV              |
| 146 | <i>K. variicola</i>  | IPM, MEM                  |
| 147 | <i>K. variicola</i>  | IPM, MEM, GM, AN, SXT     |
| 148 | <i>K. variicola</i>  | IPM, MEM, GM, AN, NN, SXT |
| 149 | <i>K. variicola</i>  | IPM, MEM, AN              |
| 150 | <i>K. variicola</i>  | IPM, MEM, GM, AN          |
| 151 | <i>K. variicola</i>  | IPM, MEM, AN              |
| 152 | <i>K. variicola</i>  | FEP, IPM, MEM, GM, AN     |
| 153 | <i>K. variicola</i>  | CAZ, IPM, MEM, AN, SXT    |
| 154 | <i>K. variicola</i>  | IPM, MEM, AN, CIP, LEV    |
| 155 | <i>K. variicola</i>  | IPM, MEM, GM, AN, SXT     |
| 156 | <i>K. variicola</i>  | IPM, MEM, GM, AN, SXT     |
| 157 | <i>K. variicola</i>  | IPM, MEM, GM, AN, SXT     |
| 158 | <i>K. variicola</i>  | IPM, MEM, GM, AN, NN      |
| 159 | <i>K. variicola</i>  | IPM, MEM, GM, AN          |
| 160 | <i>K. variicola</i>  | IPM, MEM, GM, AN          |

AN – amikacin, CAZ – ceftazidim, CIP – ciprofloxacin, GM - gentamicin , IPM - imipenem, LEV – levofloxacin, MEM – meropenem, NN - tobramycin, SXT – cotrimoxazole, TZP – piperacillin/tazobactam
